1 **The architecture of the human RNA-binding protein**  
2 **regulatory network**

3

4 Alessandro Quattrone and Erik Dassi\*

5 *Centre for Integrative Biology, University of Trento, Trento, Italy*

6

7 \*Correspondence to [erik.dassi@unitn.it](mailto:erik.dassi@unitn.it)

8

9

10 **Running head:** *The RBP-RBP regulatory network*

11

12 **Keywords:** *RNA-binding proteins, post-transcriptional regulation,*  
13 *regulatory network, regulatory elements, cooperation, competition*

14

15

16

17

18

19

## 20 **Abstract**

21 RNA-binding proteins (RBPs) are key players of post-transcriptional regulation of gene  
22 expression. These proteins influence both cellular physiology and pathology by regulating  
23 processes ranging from splicing and polyadenylation to mRNA localization, stability, and  
24 translation. To fine-tune the outcome of their regulatory action, RBPs rely on an intricate web of  
25 competitive and cooperative interactions. Several studies have described individual interactions  
26 of RBPs with RBP mRNAs, suggestive of a RBP-RBP regulatory structure. Here we present the  
27 first systematic investigation of this structure, based on a network including almost fifty thousand  
28 experimentally determined interactions between RBPs and bound RBP mRNAs.

29 Our analysis identified two features defining the structure of the RBP-RBP regulatory network.  
30 What we call “RBP clusters” are groups of densely interconnected RBPs which co-regulate their  
31 targets, suggesting a tight control of cooperative and competitive behaviors. “RBP chains”,  
32 instead, are hierarchical structures driven by evolutionarily ancient RBPs, which connect the  
33 RBP clusters and could in this way provide the flexibility to coordinate the tuning of a broad set  
34 of biological processes.

35 The combination of these two features suggests that RBP chains may use the modulation of  
36 their RBP targets to coordinately control the different cell programs controlled by the RBP  
37 clusters. Under this *island-hopping* model, the regulatory signal flowing through the chains hops  
38 from one RBP cluster to another, implementing elaborate regulatory plans to impact cellular  
39 phenotypes. This work thus establishes RBP-RBP interactions as a backbone driving post-  
40 transcriptional regulation of gene expression to allow the fine-grained control of RBPs and their  
41 targets.

42

43

## 44 Introduction

45 In the last years post-transcriptional regulation of gene expression (PTR) has gained recognition  
46 as a crucial determinant of protein levels, and consequent cell phenotypes (Schwanhäusser et  
47 al. 2011; Vogel et al. 2010), stimulating a rising interest in studies focused on RNA-binding  
48 proteins (RBPs) and the interactions with their RNA targets.

49 RBPs are a key class of regulators in PTR. They are less than two thousand proteins in the  
50 human genome (almost 1200 verified RBPs plus several recently discovered ones (Castello et  
51 al. 2012)) and are made of modular domains of which RRM is the most represented one, found  
52 in over 200 proteins (Lunde et al. 2007). RBPs control processes ranging from splicing and  
53 polyadenylation to mRNA localization, stability, and translation (Gerstberger et al. 2014). To  
54 fine-tune the outcome of their regulatory action, RBPs rely on an intricate web of competitive  
55 and cooperative interactions (Dassi 2017).

56 Techniques such as ribonucleoprotein immunoprecipitation (RIP) and cross-linking and  
57 immunoprecipitation (CLIP) variants (Lee and Ule 2018) now allow us to identify the RNA  
58 targets of an RBP at the genome-wide scale. RBPs are involved in multiple aspects of  
59 physiology (e.g. brain and ovary development, immune response and the circadian cycle  
60 (Gerstberger et al. 2014; Lim and Allada 2013)) and pathology, being their alteration associated  
61 with a variety of diseases such as cancer, neurological and neuromuscular disorders (Wurth  
62 and Gebauer 2015; Lukong et al. 2008). The importance of obtaining a proper understanding of  
63 RBP properties and functions is thus evident.

64 While identifying the mRNA targets of RBPs, several works have highlighted among them an  
65 enrichment of mRNAs coding for gene expression regulators, including other RBPs but also  
66 transcription factors (TFs). This finding brought to the *regulator-of-regulators* concept (Keene  
67 2007; Mansfield and Keene 2009), hinting at the existence of an extensive regulatory hierarchy  
68 of RBPs. For instance, we and others have specifically studied the *HuR/ELAVL1* protein (Dassi

69 et al. 2013; Mukherjee et al. 2011; Pullmann et al. 2007), which resulted to regulate the mRNAs  
70 of many RBPs (Mukherjee et al. 2011), several of which contain its same RNA-binding domain,  
71 the RRM. The increasing number of high-throughput data available is now allowing us to probe  
72 if this phenomenon occurs on a genome-wide scale. We chose to address this issue by  
73 specifically extracting the binding map of RBPs to their cognate mRNA and mRNAs of other  
74 RBPs. A similar approach has been previously applied for TF targets and metabolic networks in  
75 lower organisms such as *E. coli* and *S. cerevisiae* (Qijun Liu et al. 2009; Jothi et al. 2009; Pham  
76 et al. 2007); the human TF-TF regulatory interaction network, testing the *regulator-of-regulators*  
77 concept in TFs, has also been described for 41 cell types (Neph et al. 2012).

78 We present here the first systematic characterization of the RBP regulatory network, built by  
79 integrating experimental data on RBP targets. While sharing several properties of gene  
80 regulatory networks, its distinctive local structure hints at the specific dynamics of post-  
81 transcriptional regulation. We identified two major components which define the network  
82 structure. First, we found groups of densely connected RBPs which control each other to likely  
83 regulate cooperative and competitive behaviors on mutual targets. Then, we identified  
84 hierarchical node chains as the second feature shaping the network. In combination with RBP  
85 groups, these widespread regulatory units concur to the formation of a post-transcriptional  
86 backbone acting on multiple processes at once and could serve to coordinate major cell  
87 programs shaping cell phenotypes.

88

## 89 **Results**

### 90 **Building the RBP-RBP network**

91 Large-scale mapping of interactions between RBPs and their cognate mRNAs has been  
92 conducted by CLIP-like approaches (Lee and Ule 2018) in a few cellular systems, primarily  
93 HEK293, HeLa, and MCF7 cell lines. We previously collected these and other interactions in the

94 AURA 2 database (Dassi et al. 2014). We have now built the human RBP-RBP mRNA  
95 interaction network by extracting all related data and filtering each interaction by the expression  
96 of both interactors in the HEK293 cell line. To verify the generality of properties identified in this  
97 cell line, we have also constructed the same network for the other two cell lines with sufficient  
98 CLIP-like data, HeLa and MCF7. In our network vertices represent RBPs, and the presence of  
99 an edge between a source (protein) and a target (mRNA) RBP implies binding of the target RBP  
100 mRNA by the source RBP (which could result in post-transcriptional control of gene expression).  
101 The network includes 1536 RBPs out of 1827 (see methods for details on how we built the RBP  
102 list) connected by 47957 interactions. A total of 176 RBPs (11,5%) have outgoing interactions in  
103 the network (i.e., they bind the mRNA of an RBP) mostly coming from CLIP-like assays; the  
104 median network degree (number of connections) is 29, while the median number of individual  
105 binding sites for each RBP on each target RBP mRNAs is equal to 4. Among RBPs with  
106 outgoing interactions, 63 (35.8%) have self-loops (i.e., they bind their mRNA), confirming the  
107 general propensity of RBPs for autologous regulation. All interactions are listed in **Table S1**, and  
108 an interactive browser allowing to explore this and other networks is available at the AURA 2  
109 (Dassi et al. 2014) website (<http://aura.science.unitn.it>).  
110

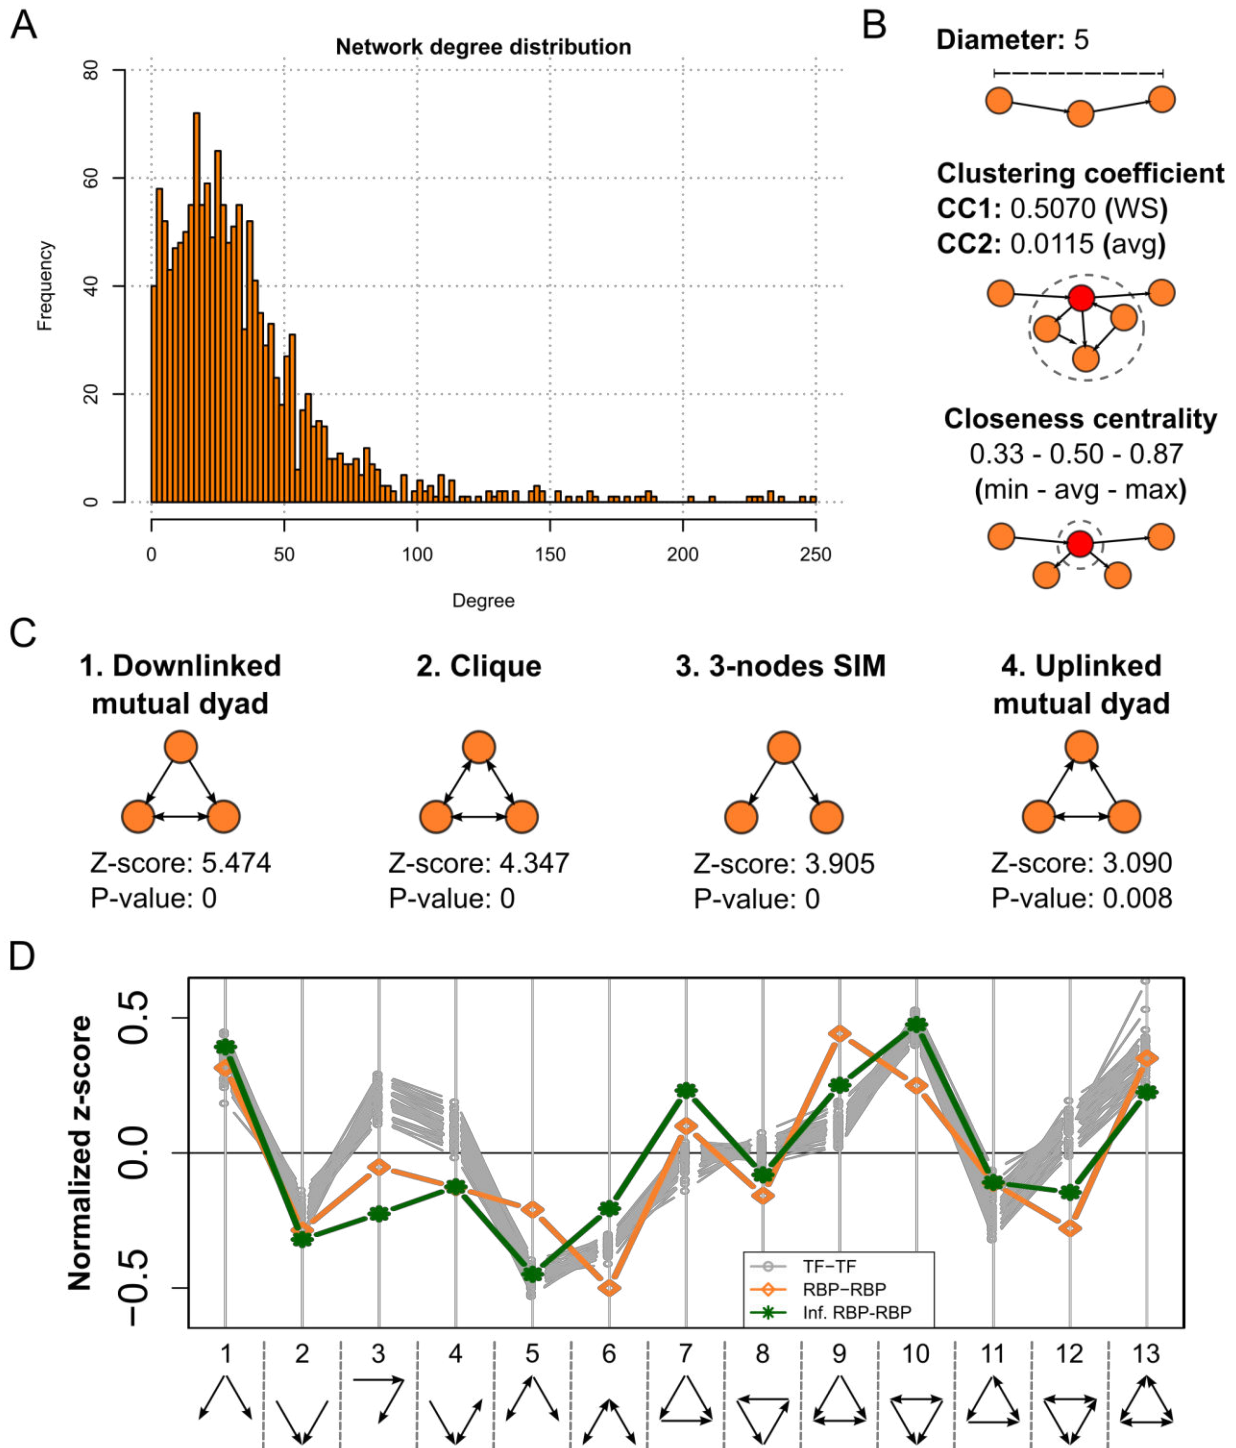

111

112 **Figure 1: The RBP-RBP network is a gene regulatory network with a distinctive structure.**

113 **A)** shows the network degree distribution (up to 250), which follows a power-law. **B)** shows the

114 network diameter (top), its average clustering coefficients (middle, Watts-Strogatz 1-neighbor

115 coefficient, named CC1, and 2-neighbor coefficient, named CC2) and closeness centrality  
116 (bottom, minimum, average and maximum values for all nodes). **C**) shows the four most  
117 significant 3-nodes motifs identified by FANMOD with their z-score and p-value. **D**) displays the  
118 triad significance profile for the RBP-RBP network (orange line), the inferred RBP-RBP network  
119 (green line) and 41 TF-TF networks (gray lines). Positive z-scores indicate enrichment, negative  
120 ones depletion. While most motifs have similar z-scores in both networks, motifs 3, 4, 5, 9, 10  
121 and 12 are differentially enriched in the RBP-RBP network, suggesting a distinctive structure  
122 with respect to the TF-TF networks.

123

#### 124 **The RBP-RBP network is a navigable “small-world” network**

125 We first sought to verify whether the RBP-RBP network is a typical gene regulatory network, i.e.  
126 is “scale-free” and “small-world”. To this end, we computed several global properties of the  
127 HEK293 cell network, shown in **Figure 1**. The degree distribution (**1A**) is following a power-law,  
128 with most nodes having a degree lower than 50 and a minor fraction reaching degrees over 200.  
129 This suggests that the network is scale-free, composed of a few central hubs and many  
130 progressively more peripheral nodes. The diameter (**1B**,  $D=5$ ) indicates the network to be  
131 largely explorable by a few steps. Clustering coefficients (**1B**) suggest the presence of local-  
132 scale clustering (1-neighbor coefficient,  $CC1=0.507$ ) which is lost when extending to more  
133 distant nodes (2-neighbor coefficient,  $CC2=0.0115$ ). Eventually, closeness centrality (**1B**,  
134  $C_c=0.5033$ ) reiterates that most nodes are reachable by a small number of steps. We thus  
135 quantified this intuitive idea of network small-worldness by computing the  $S^{WS}$  measure  
136 (Humphries and Gurney 2008), which classifies a network as small-world when greater than 1.  
137 We obtained a value of 31.03, clearly supporting the hypothesis. Taken together, these values  
138 indeed put the network into the “small-world” class. Given its small diameter and high  
139 connectedness, the network can be considered navigable (Kleinberg 2000), i.e. apt to promote  
140 efficient information transmission along its paths. Eventually, we investigated the network

141 control structure (how it can be driven to any of its possible states), as described in (Ruths and  
142 Ruths 2014). We computed the network control profile, which resulted being [ $s=0.00367$ ,  
143  $e=0.99632$ ,  $i=0.0$ ], with  $s$  representing sources,  $e$  the external dilations and  $i$  the internal  
144 dilations. Hence, the network is dominated by external dilations ( $e$ ), a fact that locates it in the  
145 class of top-down organization systems, structured to produce a correlated behavior throughout  
146 the system: members of this class are transcriptional networks, peer-to-peer systems, and  
147 corporate organizations (Ruths and Ruths 2014). These properties also hold in the HeLa and  
148 MCF7 networks, suggesting the stability of the network structure with different subsets of  
149 expressed RBPs (**Table S2**). We thus focused on the HEK293 network only for subsequent  
150 analyses.

151

## 152 **RBP-RBP interactions define a hierarchical network structure**

153 We then analyzed the local network structure by identifying motifs, i.e. recurrent patterns of RBP  
154 interaction. We used FANMOD (Wernicke and Rasche 2006) to look for 3-nodes motifs, of  
155 which several patterns have previously been characterized (e.g., the feed-forward loop and  
156 others (Milo et al. 2002)). The most significant motifs are shown in **Figure 1C**: among these, the  
157 *down-linked mutual dyad* (DMD) is the most enriched motif in our network. Together with the  
158 *single-input module* (SIM, third most enriched motif), these motifs indicate widespread use of  
159 hub-like patterns. The enrichment in DMD and *up-linked mutual dyad* (UMD, fourth most  
160 enriched motif), suggest a structure of ranked clusters for our network. Under this model, the  
161 dyads connect different hierarchical ranks within a network, with individual ranks structured as  
162 node clusters (1985; de Nooy et al. 2005). Instances of these motifs include *FXR2*, *HNRNPF*,  
163 and *TNRC6B* for the DMD, and *IGF2BP1*, *YWHAE*, and *YWHAG* for the SIM (with the first  
164 binding to the other two mRNAs). One realization of the UMD is that of *ELAVL1*, *LIN28B*, and  
165 *SYNCRIP* (e.g., both binding to *SYNCRIP* mRNA and the mRNA of each other).



166 We then identified 4-node motifs, the most significant of which are shown in **Supplementary**  
167 **Figure S1**. Among these, the forwarded uplinked mutual dyad is used to forward the output of  
168 an uplinked mutual dyad to a further RBP, and thus is a hierarchical, rank-connecting extension  
169 of the UMD. Furthermore, the chain-feeding dyad is made of a dyad which transmits its  
170 regulatory signal to two linearly connected RBPs, thus realizing a hierarchical structure as well.  
171 Given their properties, these two motifs provide further support to a ranked clusters model for  
172 the structure of our network.

173

#### 174 **The structure of the RBP-RBP network is different from the TF-TF one**

175 We thus sought to compare the motif structure of the RBP-RBP network with the one of another  
176 network of regulators, the TF-TF network described in (Neph et al. 2012) for 41 cell types. We  
177 thus computed the triad significance profile (TSP) for these networks as described in (Milo et al.  
178 2002). The TSP quantifies the use of the various three-nodes motifs by the network under  
179 analysis, and thus recapitulates its local structure. To complement this analysis, we also asked  
180 ourselves whether the structure of our network could be considered representative of the  
181 unavailable “complete” RBP-RBP network. To answer this question we thus built an inferred  
182 RBP-RBP network by collecting experimentally determined RBP-bound regions as per a protein  
183 occupancy profiling assay in HEK293 cells (Baltz et al. 2012). We then matched these regions  
184 to the binding motifs of 193 human RBPs derived from the *in vitro* RNAcompete assay (Ray et  
185 al. 2013). We obtained a network of 108161 RBP-RBP interactions. This network, independently  
186 reconstructed from two experimental datasets, becomes a validation of the general structure we  
187 propose for the RBP-RBP network.

188 We eventually compared the TSP of the three networks. The results are shown in **Figure 1D**,  
189 and we observe two salient aspects. First, the RBP-RBP network and its inferred version have a  
190 very similar motif structure (Pearson correlation=0.838, p-value=3.47e-04), with limited  
191 magnitude differences only, suggesting that our network structure is reproducible and a

192 representative cross-section of the complete set of RBP-RBP interactions. Then, the TF-TF  
193 structure is instead more distant (mean Pearson correlation=0.719 across the 41 networks).  
194 Indeed, 5/13 motifs are differentially represented in the RBP-RBP network (enriched instead of  
195 depleted or vice versa), and the DMD is preferred over the UMD (the opposite being true for the  
196 TF-TF networks). This suggests specialization of network structures by RBP-RBP interactions  
197 with respect to TF-TF ones.

198

### 199 **The stoichiometry of RBP complexes is not determined by RBP-RBP regulatory** 200 **interactions**

201 We then asked if some type of biological constraints could be behind the evolutionary shaping  
202 of the specific geometry of the RBP-RBP network. One likely hypothesis is that many  
203 constraints are produced by interacting RBPs being part of the same ribonucleoprotein complex.  
204 To test this hypothesis, we overlapped the interactions in our network with the experimental  
205 binary protein-protein interactions (PPIs) contained in STRING (Szklarczyk et al. 2017), IntAct  
206 (Orchard et al. 2014), and BioPlex (Huttlin et al. 2017). The low amount of network interactions  
207 found to be mirrored in PPIs (3.37% for STRING, 0.57% for IntAct, and 0.29% for BioPlex)  
208 suggests that the network wiring is not made to assure the availability of RBPs for complex  
209 assembly. As this analysis dealt with single interactions, we then turned to whole complexes, as  
210 stoichiometric ones (i.e., requiring precise quantities of each of the components for proper  
211 functioning) may instead rely on this mechanism. We employed data from CORUM (Ruepp et  
212 al. 2010) and found 1818 interactions overlapping a complex, corresponding to only 3.79% of  
213 the network. **Table S3** lists complexes with at least five interactions in the network involving  
214 their subunits. A few complexes are highly represented, including the large Drosha complex  
215 (95% of its subunits are in the network, connected by 88 interactions) and the spliceosome  
216 (83% of its subunits and 732 interactions). This suggests that only for some notable exceptions

217 stoichiometry of protein complexes is possibly driving the establishment of interactions in the  
218 RBP-RBP network.

219

## 220 **Communities do not globally define the structure of the RBP-RBP network**

221 To obtain a more general understanding of RBP-RBP interactions, we thus asked ourselves  
222 whether the network had a modular structure, made of RBP communities aimed at regulating  
223 specific biological processes. We used SurpriseMe (Aldecoa and Marin 2013), a tool for the  
224 investigation of community structures implementing several algorithms. SurpriseMe is based on  
225 Surprise (S) maximization (Aldecoa and Marin 2013), which has been shown to outperform the  
226 classic Girvan-Newman modularity measure Q (Newman and Girvan 2004). We used the  
227 communities identified by the two best-scoring algorithms implemented in the tool, namely CPM  
228 (Palla et al. 2005) and RNSC (King et al. 2004) (S=13698 and 13353 resp.). These algorithms  
229 detected a poor degree of modularity in the network: as shown in **Figure 2A**, 89% of the  
230 communities are singletons (i.e., formed by a single RBP) and only 8 contain more than 20  
231 RBPs (1 with CPM and 7 with RNSC). Furthermore, both algorithms identified a huge  
232 community comprising a substantial portion of the network, suggesting a limited presence of  
233 true clustered structures. In that respect, the TF-TF networks appear to be much more modular,  
234 with much fewer communities identified as singletons (avg. of 53 vs. 657 for the RBP-RBP  
235 network) and higher average community size (avg. of 5 vs. 2.08). Eventually, we explored the  
236 enrichment of biological functions in the communities but detected no clear association involving  
237 most members of any of these. CPM and SCluster-derived communities are listed in **Table S4A**  
238 and **S4B**. Globally, these results suggest that the conventional community definition does not fit  
239 well the RBP-RBP network, which may thus be structured differently.

240

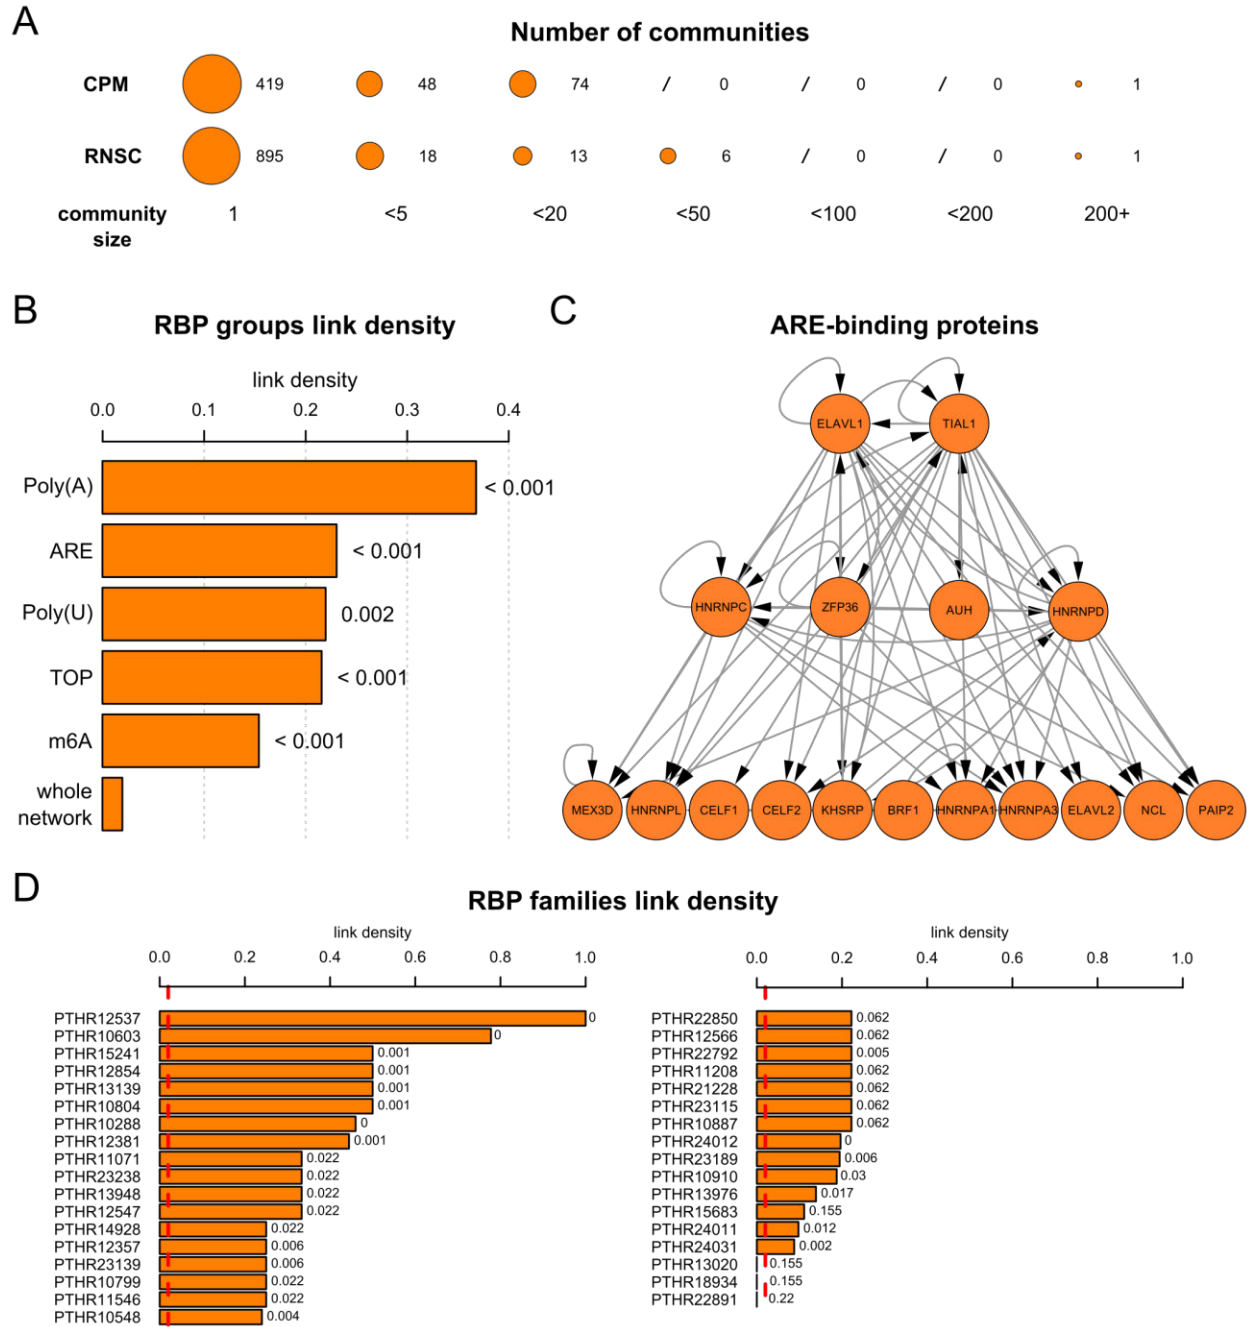

241

242 **Figure 2: RBPs regulating common sets of targets are significantly more interconnected.**

243 **A)** displays the low modularity of the network as per the CPM and RNSC communities. Most are

244 singletons, and one contains more than 25% of all RBPs. **B)** shows link density for the whole

245 network and several groups of target-sharing RBPs: ARE, m6A, Poly(A), Poly(U) and TOP-

246 binding proteins; 1000-samples bootstrap p-values are shown next to each bar. **C)** shows the

247 complete network of ARE-binding proteins, revealing a hierarchical structure dominated by  
248 *ELAVL1* and *TIAL1*. **D**) shows link density for families of RNA-binding proteins found in the  
249 network. A red dotted line indicates whole-network link density, and 1000-samples bootstrap p-  
250 values are shown next to each bar.

251

## 252 **RBP-RBP interactions occur in clusters dictated by their common target mRNAs**

253 The number and size of the detected communities indicate a low modularity of the RBP-RBP  
254 network, likely due to a peculiar community structure which cannot be detected by current  
255 algorithms. To further study this aspect, we set out to investigate a more general principle, that  
256 of interactions between RBPs in the network being connected to cooperatively or competitively  
257 sharing mRNA targets. RBP-RBP network wiring constraints could indeed be due to  
258 combinatorial RBP interactions through their targets (both RBPs, which are in the network, and  
259 non-RBPs, which are outside it). We thus extracted all mRNA targets for each RBP in the  
260 network from the AURA 2 database (Dassi et al. 2014) and computed the overlap for every RBP  
261 pair. We compared these overlaps for protein-mRNA pairs in the network (interacting RBPs)  
262 and pairs not in the network (non-interacting RBPs). The results indicated that interacting RBPs  
263 share significantly more targets than non-interacting RBPs (median 141 and 52 resp., Wilcoxon  
264 test  $p < 2.2E-16$ ). To investigate the biological meaning of this general phenomenon, we then  
265 studied sets of RBPs known to bind to the same cis-element and consequently sharing most, if  
266 not all, of their targets. We considered AU-Rich Element (ARE) binding proteins (Barreau et al.  
267 2005), proteins interacting with the 5'UTR terminal oligopyrimidine tract (TOP) element  
268 (Tcherkezian et al. 2014; Hamilton et al. 2006), proteins interacting with the m6A RNA  
269 modification sites ((Roignant and Soller 2017)), and finally proteins interacting with with poly(U)  
270 RNAs, and with the poly(A), a major cis-determinant of mRNA stability and translation (Goss  
271 and Kleiman 2013). ARE-binding proteins, in particular, are known to display both cooperative  
272 and competitive behaviors (Barreau et al. 2005). We computed link density (i.e. the fraction of

273 all possible RBP-RBP interactions made within a group) for the whole network and each group.  
274 As shown in **Figure 2B**, all groups have significantly higher link densities than the whole  
275 network (7.8-18.7 times higher, 1000-samples bootstrap p-values=0.002 or less). The group  
276 with most interactions is the ARE-binding proteins (68 interactions), whose complete network is  
277 shown in **Figure 2C**. A hierarchical structure is visible, where *HuR/ELAVL1* and *TIAL1* are the  
278 major regulators (highest out-degree and lowest in-degree), connected to a second level  
279 (*ZFP36*, *HNRNPC*, *HNRNPD*, and *AUH*), which then controls the remaining RBPs (lowest out-  
280 degree).  
281 Expanding on this idea, we eventually analyzed the link density of all annotated RBP families  
282 (as defined by Ensembl (Zerbino et al. 2018), see Methods). We assumed that, most often,  
283 members of the same RBP family cooperate or compete to regulate their common mRNA  
284 targets (Dassi 2017). Of the 288 families, 35 have at least two members in the network (i.e.,  
285 taking part in at least one interaction). The median link density of these families is 0.24, with  
286 32/35 having a higher density than the whole network (of these, 25 are significant according to a  
287 1000-samples bootstrap) (**Figure 2D**). Although including only a fraction of all families, this  
288 results further indicate that RBP-RBP interactions may be needed to regulate cooperative and  
289 competitive behaviors on mutual targets, and that this behavior could be more prevalent than is  
290 currently known. “*RBP clusters*” (including families and sets of RBPs binding to the same cis-  
291 element) thus represent the community structure of the RBP-RBP network.

292

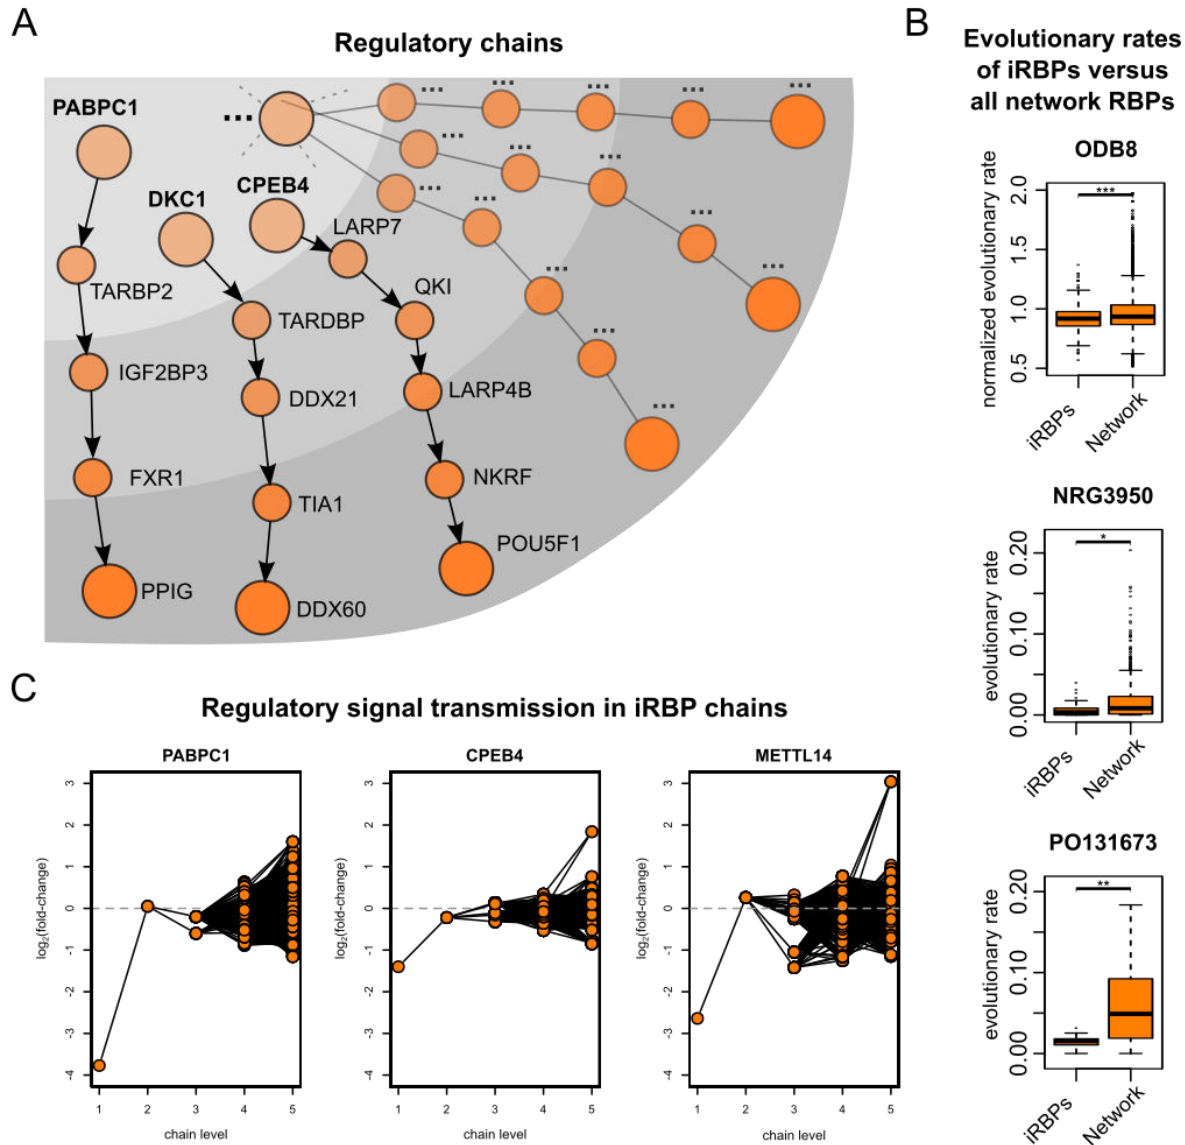

293

294 **Figure 3: RBP chains dispatch regulatory information in the network. A)** examples of RBP

295 chains. Dashed lines and dotted name represent an iRBP heading many RBP chains.

296 Increasing node color intensity represents the transmission of regulatory input through the

297 chain, from the first to the last node. **B)** evolutionary rates of iRBPs and all RBPs in the network,

298 obtained from the ODB8 database and two articles. iRBPs have a significantly lower rate in all  
 299 datasets (Wilcoxon test  $p=5.2E-05$ , 0.0128 and 0.0016 for ODB8, NRG3950, and PO131673).

300 **C)** Displays the  $\log_2$  fold-change for RBPs at the various levels of chains led by PABPC1,

301 CPEB4, and METTL14 when silencing these iRBPs. The first level of the chain is the silenced

302 iRBPs, while level 5 represents the last RBP of a chain (with levels 2..4 being intermediate  
303 steps of each chain). Lines represent the RBP-RBP connections in a chain while orange circles  
304 represent RBPs.

305

### 306 **RBP chains are master regulatory units of the cell**

307 The interactions identified by analyzing RBP clusters are, however, only a fraction of all links in  
308 the network. We thus hypothesized that, alongside these community-like structures, the network  
309 could also be employing linear node chains as its functional units. To study this aspect, we  
310 extracted chains of length 4 and 5 (longest network path) from the network (examples are  
311 shown in **Figure 3A**). To assess their relevance, we checked whether chains were more  
312 functionally homogeneous (i.e. composed of RBPs with more closely related functions) than  
313 algorithm-derived communities, taken as comparison given their poor ability to capture the  
314 structure of the RBP-RBP network. We thus computed a *functional coherence* score as the  
315 average semantic similarity score for each pair of RBPs in a chain or community. Chains display  
316 a significantly higher functional coherence than algorithm-derived communities (Wilcoxon test  
317  $p=9.01E-07/0.0347$  for CPM/RNSC for chains of length 4;  $p=7.562E-06/0.086$  for CPM/RNSC  
318 for length 5; shown as density in **Figure S2**). Chains thus seem to be relevant to the RBP-RBP  
319 network organization. In the TF-TF network, chains are instead significantly less coherent  
320 (average 0.41/0.43 vs. 0.75/0.73 for TF-TF and RBP-RBP of length 4 and 5 resp.; Wilcoxon test  
321  $p<2.2E-16$  for both lengths), suggesting a lesser importance of such units in this network.

322 Chains are headed by a few initiator RBPs (iRBPs, 53 genes): these could be the most  
323 influential regulators, able to control many other RBPs and processes to dictate cell phenotypes.  
324 Therefore, iRBPs could be essential for the proper execution of cell processes. On this  
325 assumption, we searched for iRBPs in essential genes (defined by the underrepresentation of  
326 gene-trap vectors integration in their locus) of two human cell lines, as per a recent work  
327 (Blomen et al. 2015). As shown in **Table S1**, a third of the iRBPs are essential in both cell lines,



328 with 21 (40%) essential in the HAP1 line. iRBPs are enriched for essential genes in these cell  
329 models (max. Fisher test  $p=1.73E-05$ ), and a 1000-samples bootstrap was significant ( $p<0.001$ )  
330 in both cell lines and their intersection. Most iRBPs (43/53, 81%) are also essential in at least  
331 one cellular model as per RNAi screenings included in the GenomeRNAi database (Schmidt et  
332 al. 2013). Merging all these annotations yields the remarkable total number of 46/53 iRBPs  
333 essential in at least one cell model (86%). To further strengthen this finding, we obtained the  
334 orthologs of iRBPs in mouse, *D. melanogaster*, and *C. elegans*, and compared them with  
335 essential genes in those organisms. As shown in **Table S5**, **S6**, and **S7**, the enrichment of  
336 essential genes in iRBPs is highly significant also for these organisms.

337 The iRBPs could also be highly conserved, due to their fundamental role in driving the RBP  
338 chains. We thus investigated whether these RBPs are more evolutionarily constrained than  
339 other RBPs. We extracted evolutionary rates of sequence divergence from the ODB8 database  
340 (Zdobnov et al. 2017) and (Zhang and Yang 2015), and rates of purifying selection from  
341 (Kryuchkova-Mostacci and Robinson-Rechavi 2015). We observed that, in all datasets, iRBPs  
342 have a significantly lower evolutionary rate than all RBPs in the network (**Fig 3B**; Wilcoxon test  
343  $p=5.2E-05$ , 0.0128 and 0.0016 for ODB8, NRG3950 and PO131673 respectively). Furthermore,  
344 we also investigated whether the iRBPs PTR is evolutionarily constrained. We thus computed  
345 their average UTR conservation, and first found that UTRs of RBPs in the network are more  
346 conserved than the UTRs of all genes (Wilcoxon test  $p < 2.2E-16$  for 5' and 3' UTRs). As the  
347 network includes most RBPs, this feature is characteristic of RBP genes. iRBPs 3'UTR  
348 conservation was also found to be significantly higher than that of other RBPs (Wilcoxon test  
349  $p=0.002142$ ). This ultra-conservation, coupled with the essentiality of most iRBPs, consistently  
350 support their importance as key cell regulators.

351 We eventually asked ourselves whether the regulatory information is transmitted through the  
352 chains, from the iRBPs down to the last node. To study this aspect, we obtained and reanalyzed  
353 publicly available transcriptome profiles of knock-down experiments for three iRBPs (two with

354 chains of length 4 and 5, *PABPC1* and *CPEB4*, and one with chains of length 4, *METTL14*, see  
355 Methods) in human cells. These RBPs act on various processes, including, for *PABPC1* and  
356 *METTL14*, the regulation of mRNA stability. (Weng et al. 2018; Wang and Kiledjian 2000). We  
357 thus expect to detect at least a partial effect of their knock-down on these transcriptomes. We  
358 plotted the fold-change (knock-down versus control) of the RBPs composing the chains  
359 controlled by each of the three iRBPs. As shown in **Figure 3C**, a sizeable fraction of all chain  
360 members are differentially expressed (23.9% for *PABPC1*, 22.4% for *CPEB4*, and 46.3% for  
361 *METTL14* at the adjusted p-value threshold of 0.05); if considering only a permissive fold-  
362 change threshold of 1.1 these numbers rise two to three times (66.1% for *PABPC1*, 44.1% for  
363 *CPEB4*, and 61.9% for *METTL14*). It must be noted that other modes of regulation, which  
364 cannot be observed in these datasets, can also be used by these proteins aside from mRNA  
365 stability (e.g., translational control). This data thus suggest that the regulatory information  
366 sparked by an iRBP is indeed transmitted through its chains, likely expanding the set of  
367 processes which can be controlled by these proteins. Chains are thus a functional unit in the  
368 RBP-RBP network, complementing the observed RBP clusters.

369

### 370 **The RBP-RBP network is a robust and efficient hierarchy**

371 We finally asked ourselves which were the implications of RBP chains on the global network  
372 structure. A reasonable hypothesis is that chains induce a hierarchical structure, as also  
373 suggested by the ranked clusters model we observed as defining the local network structure.  
374 We thus measured how hierarchical is the RBP-RBP network (Cheng et al. 2015), which  
375 revealed it as much more than any of the 41 TF-TF networks. When considering a hierarchy of  
376 2, 4 or 6 levels; p-value is always orders of magnitude lower, with a  $-\log_{10}p$  of 14.2 versus an  
377 average of 3.85 for TF-TF networks at six levels. Furthermore, feedback loops (not coherent  
378 with a hierarchical organization) are depleted in the network, representing 0.0085% of the motifs

379 only; feed-forward loops, coherent with a hierarchical organization, are instead enriched and  
380 amount to 3.29% of the motifs.

381 We then assessed another desirable property, that of network robustness to the “removal” (i.e.,  
382 loss of function) of an RBP from the network. To do so, we computed the pairwise  
383 disconnectivity metrics on each node (Potapov et al. 2008). The metric is low (only 0.14% of  
384 pairs are disconnected on average when removing a node from the network) and significantly  
385 lower than for the TF-TF networks (average is three times higher for TFs, worst p-value=5.6E-  
386 104). The network is thus well-tolerant to losing a node (fewer nodes are disconnected when  
387 removing a node), which implies that RBP-RBP interactions are robust. This feature is likely  
388 granted by the use of densely connected RBP clusters, resulting in partially redundant  
389 regulation.

390 Eventually, while RBP clusters are redundant by definition (as they co-regulate a largely  
391 overlapping set of targets), we asked whether also single RBP chains shared this property. We  
392 thus computed the overlap between all targets (both RBPs, which are in the network, and non-  
393 RBPs, which are outside it) of RBPs at the various levels of each chain of length 5. It resulted  
394 being particularly low, as only 7.6% of the targets are overlapping between any two levels  
395 (median of all chains, average of each pair in a chain; the range is 2.8%-15.5%). Differently  
396 from RBP clusters, we can thus say that chains are efficient, as targets are not redundantly  
397 regulated by individual RBPs along the chain, but rather are predominantly organized in  
398 complementary sets at each of its nodes. This efficiency comes at the expense of robustness  
399 (i.e., if one level of the chain fails the regulatory signal would most often be lost), which is  
400 instead a feature of RBP clusters. The resulting model, shown in **Figure 4**, couples hierarchical  
401 structure, network robustness through RBP groups, and efficiency through RBP chains.

402

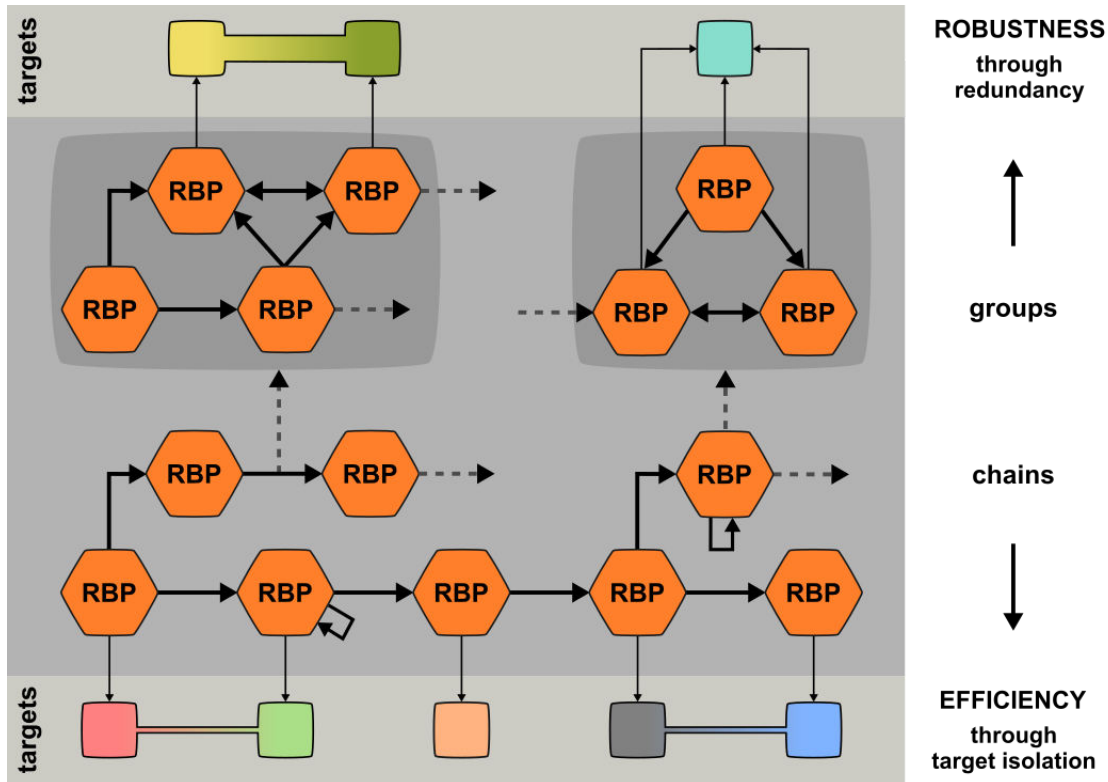

403

404

405

406

407

408

409

410

411

412

413

414

415

416

**Figure 4: The RBP-RBP network is a robust and efficient hierarchy.** Model of the RBP-RBP network as derived from our analyses. RBPs are indicated by hexagon-shaped nodes, RBP-RBP interactions by thick arrows (arrows pointing to the originating RBP represent autoregulation events), and targets sets by squares which can be shared by multiple RBPs (fraction of shared targets represented by the size of the shared area between the two squares). RBP-RBP interactions are robust due to densely connected RBP groups (co-regulating most of their targets), while RBP chains confer hierarchy and efficiency to the network, as target mRNA sets for each RBP in a chain are completely or predominantly different (“isolated”). Dashed in- and out-going arrows hint to the presence of further interactions within and between RBP groups and chains in the network.

## 417 **Discussion**

418 We presented here the first characterization of the RBP-RBP regulatory network. Starting from  
419 several reports hinting to a post-transcriptional hierarchy of regulators (Potapov et al. 2008;  
420 Dassi et al. 2013; Mukherjee et al. 2011; Pullmann et al. 2007), we collected available RBP-  
421 mRNA association data and described the network of interactions involving an RBP and an RBP  
422 mRNA. The network is small-world and scale-free, typical properties of gene regulatory  
423 networks. While the network is partial (as data is available for a fraction of all RBPs only), its  
424 local motif structure is highly coherent with the one of the inferred network, suggesting that it is  
425 representative of general patterns in RBP-RBP interactions.

426 Its local structure is similar to the one of TF-TF networks derived by DNase footprinting (Neph et  
427 al. 2012). However, differential enrichment of several motifs suggests that structure  
428 specialization occurs in the RBP-RBP network with respect to the TF-TF one, likely aimed at  
429 better suiting the specificities of post-transcriptional regulation. In particular, we found up- and  
430 down-linked mutual dyads as particularly enriched. These motifs are distinctive of a ranked  
431 clusters structure (Johnsen 1985), thus suggesting that the network can be divided in features  
432 conferring hierarchy and clusters of densely interacting nodes.

433 To study the role of these interactions in shaping cell phenotypes, we investigated why RBPs  
434 regulate each other. We found a few protein complexes involved in RNA metabolism and highly  
435 intra-regulated by RBP-RBP interactions. However, only a fraction of all complexes display this  
436 behavior, which cannot thus be considered general. We instead observed that groups of RBPs  
437 having overlapping targets tend to regulate each other: these interactions could represent a  
438 novel layer of regulation for cooperative and competitive behaviors between RBPs. As known  
439 for ARE-binding proteins (Barreau et al. 2005), RBPs can tune the expression of a common  
440 target by competitive or cooperative binding. We suggest that RBPs may influence the outcome  
441 of this process also by regulating the expression of the partner RBP, a mechanism which could

442 be used to reach precise ratios in a mRNP and yield the intended regulatory effect on common  
443 targets.

444 These groups represent “islands” of densely connected RBPs and are key in providing  
445 robustness to the network. Indeed, their partially redundant regulation improves the resilience of  
446 the network to the loss of function of individual RBPs.

447 However, RBP groups are not the only constituent feature of this network. Studying how RBPs  
448 interact with each other, we uncovered a set of widespread linear structures which appear to be  
449 more prevalent than communities. These structures, which we termed RBP chains and are  
450 driven by a few initiator RBPs (iRBPs), could provide enhanced flexibility with respect to a  
451 community pattern. Indeed, we believe that RBPs evolved the ability to influence a broad set of  
452 biological processes through such chains. Most iRBPs are essential for the cell, their 3'UTRs  
453 are more conserved, and their evolutionary rates are lower than for other RBPs. Taken together,  
454 these findings truly back iRBP importance as ancient master regulators of cell processes.

455 Chains profoundly shape the RBP-RBP network to be highly hierarchical. Their regulatory action  
456 confers efficiency, as the fraction of targets shared between the different chain levels is limited  
457 (i.e., regulation is not replicated along a chain), thus streamlining the flow of regulatory  
458 information from iRBPs to the final chain targets.

459 We have thus identified the two features hypothesized by the ranked clusters model: a  
460 hierarchy-inducing structure (the RBP chains), and clusters of densely interacting nodes (RBP  
461 groups). This indicates that this model fits well with the RBP-RBP network and can be found at  
462 different depths of observation: from the local, three-nodes motif structure, to the patterns  
463 defining the topology of the global network. The combination of properties offered by these  
464 features, namely robustness and efficiency, reflects the constant evolutionary pressure shaping  
465 a machinery as fundamental to the cell as is the one driving post-transcriptional regulation of  
466 gene expression. While establishing robustness only through RBP groups could in principle lead  
467 to a weaker architecture (as the regulatory signal going through chains is not replicated), it may

468 be cheaper to obtain and potentially more far-reaching. This consideration, however, raises a  
469 question: which is the role of chains in relation to RBP groups?  
470 We suggest that RBP chains use the modulation of RBP targets as a connector to different  
471 processes, represented by the RBP groups. We call this model “*island-hopping*”. Under this  
472 model, the regulatory signal originated from the chains iRBPs hops from one island (RBP group,  
473 side-connected to the chain) to another, while flowing through the chain levels, to regulate  
474 several cellular processes. This pattern thus allows potentially coordinating a broad set of  
475 functions of interest. Activating different chains would then result in the modulation of a different  
476 set of processes, granting substantial flexibility to the RBP-RBP network. This work thus  
477 establishes interactions among RBPs and RBP mRNAs as a backbone driving post-  
478 transcriptional regulation of gene expression to coordinately tune protein abundances.

479

## 480 **Materials and Methods**

### 481 **RBP list construction and annotation**

482 We built the list of human RNA-binding proteins by first extracting genes annotated as RNA-  
483 binding (GO:0003723) and protein-coding in Ensembl v92 (Zerbino et al. 2018), then merging  
484 these genes with the curated RBP list from a recent work (Sebestyén et al. 2016). The resulting  
485 list thus includes canonical and novel RBPs for a total of 1827 proteins. Families of RNA-binding  
486 proteins were extracted from Ensembl v92 gene families (Zerbino et al. 2018), by considering  
487 only families including more than one RBP.

488

### 489 **Network construction**

490 Regulatory interactions involving two RBPs were extracted from the AURA 2 database (Dassi et  
491 al. 2014). Interactions were filtered by requiring the expression of both participants in HEK293,  
492 HeLa or MCF7 cells, systems where the majority of the data were derived. Expressed genes

493 were determined by RNA-seq profiles of HEK293 (Kishore et al. 2011), HeLa (Cabili et al. 2011)  
494 and MCF7 (Vanderkraats et al. 2013), using an expression threshold of 0.1 RPKM. The  
495 direction of edges in the network represents regulation by the source RBP on the target RBP  
496 mRNA.

497 The inferred RBP-RBP network was built by collecting RBP-bound regions in mRNA UTRs from  
498 a protein occupancy profiling assay in HEK293 cells (Dassi et al. 2014; Baltz et al. 2012).  
499 RNAcompete-derived PWMs for 193 human RBPs (Ray et al. 2013) were downloaded from  
500 CISBP-RNA (Ray et al. 2013). Binding regions of these RBP on protein-bound regions were  
501 identified by Biopython (Ray et al. 2013; Cock et al. 2009), selecting the best matching RBP for  
502 each region (score threshold=0.99); only interactions involving two RBPs (one binding to the  
503 other mRNA) were included in the network.

504 The networks were deposited in NDEX with ID *ee3e8898-6e29-11e8-a4bf-0ac135e8bacf*,  
505 *f5ad750b-6e29-11e8-a4bf-0ac135e8bacf* and *fc1e526e-6e29-11e8-a4bf-0ac135e8bacf*.

506

### 507 **Network properties analysis**

508 Network diameter, degree distribution, closeness centrality, Watts-Strogatz (CC1) and two-  
509 neighbor (CC2) clustering coefficient were computed by Pajek (Batagelj and Mrvar 2002) and  
510 plotted with R (Tierney 2012). The  $S^{WS}$  measure was computed as described in (Humphries and  
511 Gurney 2008) by using the Watts-Strogatz clustering coefficient and generating the required  
512 random network with Pajek (Batagelj and Mrvar 2002). The network control structure was  
513 computed by Zen (Ruths and Ruths 2014). Hierarchical score was computed as per (Cheng et  
514 al. 2015) and pairwise disconnectivity obtained by DiVa (Potapov et al. 2008).

515 Link density for a set of nodes was computed as (number of links between nodes in the set) /  
516 (number of nodes in the set<sup>2</sup>). Bootstraps were performed by 1000 random selections of a  
517 number of nodes equal to the set size and computation of the link density for each of these.

518



## 519 **Network structure analysis**

520 Network motifs of size 3 and 4 were identified with FANMOD (Cheng et al. 2015; Wernicke and  
521 Rasche 2006) using 1000 random networks (100 for motifs of size 4, due to required computing  
522 time), 3 exchanges per edge and 3 exchange attempts. Triad significance profiles for motifs of  
523 size 3 were computed as described in (Milo et al. 2004) for the RBP-RBP network, the inferred  
524 RBP-RBP network and the TF-TF networks described in (Neph et al. 2012).  
525 Communities were studied with the SurpriseMe tool (Aldecoa and Marin 2013): CPM (Palla et  
526 al. 2005) and RNSC (King et al. 2004), the algorithms obtaining the highest S values, were used  
527 to define communities. Chains were extracted from the network with igraph (<http://igraph.org>);  
528 functional coherence scores were computed with GOSimSem (Yu et al. 2010) by averaging the  
529 semantic similarity of each pair of genes in the chain.

530

## 531 **Protein-protein interactions and complexes overlap**

532 Human protein-protein interactions were extracted from STRING (Szklarczyk et al. 2017),  
533 BioPlex (Huttlin et al. 2017), and IntAct (Orchard et al. 2014), retaining only interactions of the  
534 “binding” type (physical association) and with both partners being in our network. Human protein  
535 complexes were downloaded from CORUM (Ruepp et al. 2010). Overlaps were performed by  
536 custom Python scripts.

537

## 538 **Gene essentiality and phylogenetic conservation analysis**

539 Essential genes of human cells were obtained from (Blomen et al. 2015). Genes associated with  
540 an embryonic lethal phenotype in mouse from the MGI (Blake et al. 2017); genes associated  
541 with a lethality phenotype were extracted from WormBase (Lee et al. 2018) and FlyBase  
542 (Gramates et al. 2017) for *C.elegans* and *D.melanogaster* respectively. Orthologs of iRBPs  
543 were extracted from the same databases. Bootstraps were computed by 1000 random

544 selections of as many genes as iRBPs and computing the fractions of these in the essential  
545 genes for each organism.

546 UTR conservation scores were computed by averaging the phastCons score derived from the  
547 UCSC 46-way vertebrate alignment (Casper et al. 2018). The average score of all 5' or 3' UTRs  
548 of a gene was employed as the conservation score for that gene 5' or 3'UTRs. Protein  
549 evolutionary rates were obtained from the ODB8 database (Zdobnov et al. 2017) and two  
550 articles (Kryuchkova-Mostacci and Robinson-Rechavi 2015; Zhang and Yang 2015); statistical  
551 tests were performed by R (Tierney 2012).

552

### 553 **iRBP knock-down datasets**

554 RNA-seq datasets following the knock-down of PABPC1, CPEB4, and METTL14 were obtained  
555 from GEO (IDs: GSE88099, GSE88545, and GSE56010). Reads were quality-trimmed and  
556 adapters removed with Trimmomatic (Bolger et al. 2014), then aligned to the human genome  
557 (hg38 assembly), and transcripts quantified (Gencode v28 annotation) with STAR (Dobin et al.  
558 2013). Differential expression was eventually computed with DESeq2 (Love et al. 2014) using  
559 an adjusted p-value threshold of 0.05.

560

561

562

563

564

565

566

## 567 Supplemental Figures

### 1. Semi-bifan

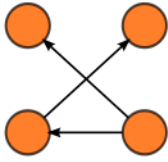

Z-score: 12.362  
P-value: 0

### 2. Forwarded uplinked mutual dyad

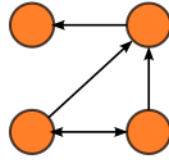

Z-score: 10.627  
P-value: 0

### 3. Chain-feeding dyad

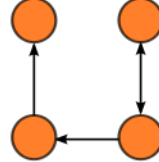

Z-score: 5.787  
P-value: 0

### 4. Biparallel

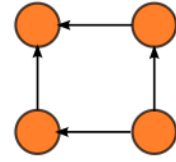

Z-score: 5.539  
P-value: 0

568

569 **Figure S1: Most enriched 4-nodes motifs in the network.** Shows the four most significant 4-

570 nodes motifs identified by FANMOD with their z-score and p-value.

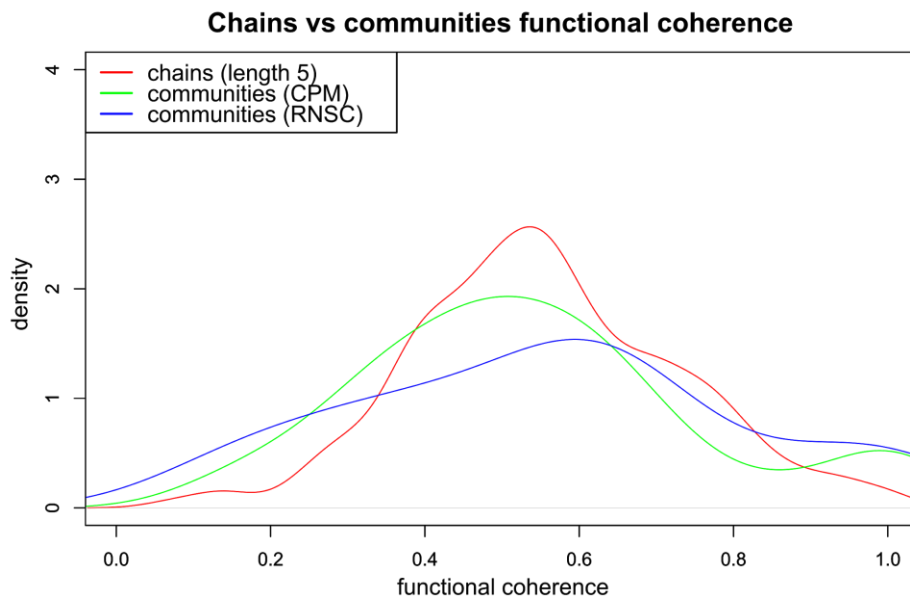

571

572 **Figure S2: Functional coherence distribution for chains versus communities.** Shows the

573 differences in density of the functional coherence values distribution between chains of length 6

574 (in red) and communities obtained by CPM (green) and RNSC (blue).

575

## 576 Acknowledgments

577 -

## 578 **Competing financial interests**

579 The authors declare no competing financial interests.

580

## 581 **References**

582 Aldecoa R, Marin I. 2013. SurpriseMe: an integrated tool for network community structure  
583 characterization using Surprise maximization. *Bioinformatics* 30: 1041–1042.

584 Baltz AG, Munschauer M, Schwanhäusser B, Vasile A, Murakawa Y, Schueler M, Youngs N,  
585 Penfold-Brown D, Drew K, Milek M, et al. 2012. The mRNA-bound proteome and its global  
586 occupancy profile on protein-coding transcripts. *Mol Cell* 46: 674–690.

587 Barreau C, Paillard L, Osborne HB. 2005. AU-rich elements and associated factors: are there  
588 unifying principles? *Nucleic Acids Res* 33: 7138–7150.

589 Batagelj V, Mrvar A. 2002. Pajek— Analysis and Visualization of Large Networks. In *Lecture*  
590 *Notes in Computer Science*, pp. 477–478.

591 Blake JA, Eppig JT, Kadin JA, Richardson JE, Smith CL, Bult CJ, the Mouse Genome Database  
592 Group. 2017. Mouse Genome Database (MGD)-2017: community knowledge resource for  
593 the laboratory mouse. *Nucleic Acids Res* 45: D723–D729.

594 Blomen VA, Májek P, Jae LT, Bigenzahn JW, Nieuwenhuis J, Staring J, Sacco R, van Diemen  
595 FR, Oik N, Stukalov A, et al. 2015. Gene essentiality and synthetic lethality in haploid  
596 human cells. *Science* 350: 1092–1096.

597 Bolger AM, Lohse M, Usadel B. 2014. Trimmomatic: a flexible trimmer for Illumina sequence  
598 data. *Bioinformatics* 30: 2114–2120.

599 Cabili MN, Trapnell C, Goff L, Koziol M, Tazon-Vega B, Regev A, Rinn JL. 2011. Integrative  
600 annotation of human large intergenic noncoding RNAs reveals global properties and  
601 specific subclasses. *Genes Dev* 25: 1915–1927.

- 602 Casper J, Zweig AS, Villarreal C, Tyner C, Speir ML, Rosenbloom KR, Raney BJ, Lee CM, Lee  
603 BT, Karolchik D, et al. 2018. The UCSC Genome Browser database: 2018 update. *Nucleic*  
604 *Acids Res* **46**: D762–D769.
- 605 Castello A, Fischer B, Eichelbaum K, Horos R, Beckmann BM, Strein C, Davey NE, Humphreys  
606 DT, Preiss T, Steinmetz LM, et al. 2012. Insights into RNA biology from an atlas of  
607 mammalian mRNA-binding proteins. *Cell* **149**: 1393–1406.
- 608 Cheng C, Andrews E, Yan K-K, Ung M, Wang D, Gerstein M. 2015. An approach for  
609 determining and measuring network hierarchy applied to comparing the phosphorylome  
610 and the regulome. *Genome Biol* **16**: 63.
- 611 Cock PJA, Antao T, Chang JT, Chapman BA, Cox CJ, Dalke A, Friedberg I, Hamelryck T, Kauff  
612 F, Wilczynski B, et al. 2009. Biopython: freely available Python tools for computational  
613 molecular biology and bioinformatics. *Bioinformatics* **25**: 1422–1423.
- 614 Dassi E. 2017. Handshakes and Fights: The Regulatory Interplay of RNA-Binding Proteins.  
615 *Front Mol Biosci* **4**: 67.
- 616 Dassi E, Re A, Leo S, Tebaldi T, Pasini L, Peroni D, Quattrone A. 2014. AURA 2. *Translation* **2**:  
617 e27738.
- 618 Dassi E, Zuccotti P, Leo S, Provenzani A, Assfalg M, D’Onofrio M, Riva P, Quattrone A. 2013.  
619 Hyper conserved elements in vertebrate mRNA 3’-UTRs reveal a translational network of  
620 RNA-binding proteins controlled by HuR. *Nucleic Acids Res* **41**: 3201–3216.
- 621 de Nooy W, Mrvar A, Batagelj V. 2005. *Exploratory Social Network Analysis with Pajek*.
- 622 Dobin A, Davis CA, Schlesinger F, Drenkow J, Zaleski C, Jha S, Batut P, Chaisson M, Gingeras  
623 TR. 2013. STAR: ultrafast universal RNA-seq aligner. *Bioinformatics* **29**: 15–21.
- 624 Gerstberger S, Hafner M, Tuschl T. 2014. A census of human RNA-binding proteins. *Nat Rev*  
625 *Genet* **15**: 829–845.
- 626 Goss DJ, Kleiman FE. 2013. Poly(A) binding proteins: are they all created equal? *Wiley*  
627 *Interdiscip Rev RNA* **4**: 167–179.

- 628 Gramates LS, Marygold SJ, Santos GD, Urbano J-M, Antonazzo G, Matthews BB, Rey AJ,  
629 Tabone CJ, Crosby MA, Emmert DB, et al. 2017. FlyBase at 25: looking to the future.  
630 *Nucleic Acids Res* **45**: D663–D671.
- 631 Hamilton TL, Stoneley M, Spriggs KA, Bushell M. 2006. TOPs and their regulation. *Biochem*  
632 *Soc Trans* **34**: 12–16.
- 633 Humphries MD, Gurney K. 2008. Network “small-world-ness”: a quantitative method for  
634 determining canonical network equivalence. *PLoS One* **3**: e0002051.
- 635 Huttlin EL, Bruckner RJ, Paulo JA, Cannon JR, Ting L, Baltier K, Colby G, Gebreab F, Gygi MP,  
636 Parzen H, et al. 2017. Architecture of the human interactome defines protein communities  
637 and disease networks. *Nature* **545**: 505–509.
- 638 Johnsen EC. 1985. Network macrostructure models for the Davis-Leinhardt set of empirical  
639 sociomatrices. *Soc Networks* **7**: 203–224.
- 640 Jothi R, Balaji S, Wuster A, Grochow JA, Gsponer J, Przytycka TM, Aravind L, Babu MM. 2009.  
641 Genomic analysis reveals a tight link between transcription factor dynamics and regulatory  
642 network architecture. *Mol Syst Biol* **5**: 294.
- 643 Keene JD. 2007. RNA regulons: coordination of post-transcriptional events. *Nat Rev Genet* **8**:  
644 533–543.
- 645 King AD, Przulj N, Jurisica I. 2004. Protein complex prediction via cost-based clustering.  
646 *Bioinformatics* **20**: 3013–3020.
- 647 Kishore S, Jaskiewicz L, Burger L, Hausser J, Khorshid M, Zavolan M. 2011. A quantitative  
648 analysis of CLIP methods for identifying binding sites of RNA-binding proteins. *Nat Methods*  
649 **8**: 559–564.
- 650 Kleinberg JM. 2000. Navigation in a small world. *Nature* **406**: 845.
- 651 Kryuchkova-Mostacci N, Robinson-Rechavi M. 2015. Tissue-Specific Evolution of Protein  
652 Coding Genes in Human and Mouse. *PLoS One* **10**: e0131673.
- 653 Lee FCY, Ule J. 2018. Advances in CLIP Technologies for Studies of Protein-RNA Interactions.

- 654 *Mol Cell* **69**: 354–369.
- 655 Lee RYN, Howe KL, Harris TW, Arnaboldi V, Cain S, Chan J, Chen WJ, Davis P, Gao S, Grove  
656 C, et al. 2018. WormBase 2017: molting into a new stage. *Nucleic Acids Res* **46**: D869–  
657 D874.
- 658 Lim C, Allada R. 2013. Emerging roles for post-transcriptional regulation in circadian clocks. *Nat*  
659 *Neurosci* **16**: 1544–1550.
- 660 Love MI, Huber W, Anders S. 2014. Moderated estimation of fold change and dispersion for  
661 RNA-seq data with DESeq2. *Genome Biol* **15**: 550.
- 662 Lukong KE, Chang K-W, Khandjian EW, Richard S. 2008. RNA-binding proteins in human  
663 genetic disease. *Trends Genet* **24**: 416–425.
- 664 Lunde BM, Moore C, Varani G. 2007. RNA-binding proteins: modular design for efficient  
665 function. *Nat Rev Mol Cell Biol* **8**: 479–490.
- 666 Mansfield KD, Keene JD. 2009. The ribonome: a dominant force in co-ordinating gene  
667 expression. *Biol Cell* **101**: 169–181.
- 668 Milo R, Itzkovitz S, Kashtan N, Levitt R, Shen-Orr S, Ayzenshtat I, Sheffer M, Alon U. 2004.  
669 Superfamilies of evolved and designed networks. *Science* **303**: 1538–1542.
- 670 Milo R, Shen-Orr S, Itzkovitz S, Kashtan N, Chklovskii D, Alon U. 2002. Network motifs: simple  
671 building blocks of complex networks. *Science* **298**: 824–827.
- 672 Mukherjee N, Corcoran DL, Nusbaum JD, Reid DW, Georgiev S, Hafner M, Ascano M Jr,  
673 Tuschl T, Ohler U, Keene JD. 2011. Integrative regulatory mapping indicates that the RNA-  
674 binding protein HuR couples pre-mRNA processing and mRNA stability. *Mol Cell* **43**: 327–  
675 339.
- 676 Neph S, Stergachis AB, Reynolds A, Sandstrom R, Borenstein E, Stamatoyannopoulos JA.  
677 2012. Circuitry and dynamics of human transcription factor regulatory networks. *Cell* **150**:  
678 1274–1286.
- 679 Newman MEJ, Girvan M. 2004. Finding and evaluating community structure in networks.

- 680 *Physical Review E* **69**. <http://dx.doi.org/10.1103/physreve.69.026113>.
- 681 Orchard S, Ammari M, Aranda B, Breuza L, Briganti L, Broackes-Carter F, Campbell NH,  
682 Chavali G, Chen C, del-Toro N, et al. 2014. The MIntAct project--IntAct as a common  
683 curation platform for 11 molecular interaction databases. *Nucleic Acids Res* **42**: D358–63.
- 684 Palla G, Derényi I, Farkas I, Vicsek T. 2005. Uncovering the overlapping community structure of  
685 complex networks in nature and society. *Nature* **435**: 814–818.
- 686 Pham H, Ferrari R, Cokus SJ, Kurdistani SK, Pellegrini M. 2007. Modeling the regulatory  
687 network of histone acetylation in *Saccharomyces cerevisiae*. *Mol Syst Biol* **3**: 153.
- 688 Potapov AP, Goemann B, Wingender E. 2008. The pairwise disconnectivity index as a new  
689 metric for the topological analysis of regulatory networks. *BMC Bioinformatics* **9**: 227.
- 690 Pullmann R Jr, Kim HH, Abdelmohsen K, Lal A, Martindale JL, Yang X, Gorospe M. 2007.  
691 Analysis of turnover and translation regulatory RNA-binding protein expression through  
692 binding to cognate mRNAs. *Mol Cell Biol* **27**: 6265–6278.
- 693 Qijun Liu, Liu Q, Wang Z, Li M, Li D, Zhu Y. 2009. Revealing the functional modularity of yeast  
694 transcriptional regulatory network by using a novel topological measurement. In *2009 2nd*  
695 *IEEE International Conference on Computer Science and Information Technology*  
696 <http://dx.doi.org/10.1109/iccsit.2009.5234476>.
- 697 Ray D, Kazan H, Cook KB, Weirauch MT, Najafabadi HS, Li X, Gueroussov S, Albu M, Zheng  
698 H, Yang A, et al. 2013. A compendium of RNA-binding motifs for decoding gene regulation.  
699 *Nature* **499**: 172–177.
- 700 Roignant J-Y, Soller M. 2017. mA in mRNA: An Ancient Mechanism for Fine-Tuning Gene  
701 Expression. *Trends Genet* **33**: 380–390.
- 702 Ruepp A, Waegle B, Lechner M, Brauner B, Dunger-Kaltenbach I, Fobo G, Frishman G,  
703 Montrone C, Mewes H-W. 2010. CORUM: the comprehensive resource of mammalian  
704 protein complexes--2009. *Nucleic Acids Res* **38**: D497–501.
- 705 Ruths J, Ruths D. 2014. Control profiles of complex networks. *Science* **343**: 1373–1376.



- 706 Schmidt EE, Pelz O, Buhlmann S, Kerr G, Horn T, Boutros M. 2013. GenomeRNAi: a database  
707 for cell-based and in vivo RNAi phenotypes, 2013 update. *Nucleic Acids Res* **41**: D1021–6.
- 708 Schwanhäusser B, Busse D, Li N, Dittmar G, Schuchhardt J, Wolf J, Chen W, Selbach M. 2011.  
709 Global quantification of mammalian gene expression control. *Nature* **473**: 337–342.
- 710 Sebestyén E, Singh B, Miñana B, Pagès A, Mateo F, Pujana MA, Valcárcel J, Eyras E. 2016.  
711 Large-scale analysis of genome and transcriptome alterations in multiple tumors unveils  
712 novel cancer-relevant splicing networks. *Genome Res* **26**: 732–744.
- 713 Szklarczyk D, Morris JH, Cook H, Kuhn M, Wyder S, Simonovic M, Santos A, Doncheva NT,  
714 Roth A, Bork P, et al. 2017. The STRING database in 2017: quality-controlled protein-  
715 protein association networks, made broadly accessible. *Nucleic Acids Res* **45**: D362–D368.
- 716 Tcherkezian J, Cargnello M, Romeo Y, Huttlin EL, Lavoie G, Gygi SP, Roux PP. 2014.  
717 Proteomic analysis of cap-dependent translation identifies LARP1 as a key regulator of  
718 5'TOP mRNA translation. *Genes Dev* **28**: 357–371.
- 719 Tierney L. 2012. The R Statistical Computing Environment. In *Lecture Notes in Statistics*, pp.  
720 435–447.
- 721 Vanderkraats ND, Hiken JF, Decker KF, Edwards JR. 2013. Discovering high-resolution  
722 patterns of differential DNA methylation that correlate with gene expression changes.  
723 *Nucleic Acids Res* **41**: 6816–6827.
- 724 Vogel C, Abreu R de S, Ko D, Le S-Y, Shapiro BA, Burns SC, Sandhu D, Boutz DR, Marcotte  
725 EM, Penalva LO. 2010. Sequence signatures and mRNA concentration can explain two-  
726 thirds of protein abundance variation in a human cell line. *Mol Syst Biol* **6**: 400.
- 727 Wang Z, Kiledjian M. 2000. The poly(A)-binding protein and an mRNA stability protein jointly  
728 regulate an endoribonuclease activity. *Mol Cell Biol* **20**: 6334–6341.
- 729 Weng H, Huang H, Wu H, Qin X, Zhao BS, Dong L, Shi H, Skibbe J, Shen C, Hu C, et al. 2018.  
730 METTL14 Inhibits Hematopoietic Stem/Progenitor Differentiation and Promotes  
731 Leukemogenesis via mRNA mA Modification. *Cell Stem Cell* **22**: 191–205.e9.

- 732 Wernicke S, Rasche F. 2006. FANMOD: a tool for fast network motif detection. *Bioinformatics*  
733 **22**: 1152–1153.
- 734 Wurth L, Gebauer F. 2015. RNA-binding proteins, multifaceted translational regulators in  
735 cancer. *Biochim Biophys Acta* **1849**: 881–886.
- 736 Yu G, Li F, Qin Y, Bo X, Wu Y, Wang S. 2010. GOSemSim: an R package for measuring  
737 semantic similarity among GO terms and gene products. *Bioinformatics* **26**: 976–978.
- 738 Zdobnov EM, Tegenfeldt F, Kuznetsov D, Waterhouse RM, Simão FA, Ioannidis P, Seppey M,  
739 Loetscher A, Kriventseva EV. 2017. OrthoDB v9.1: cataloging evolutionary and functional  
740 annotations for animal, fungal, plant, archaeal, bacterial and viral orthologs. *Nucleic Acids*  
741 *Res* **45**: D744–D749.
- 742 Zerbino DR, Achuthan P, Akanni W, Amode MR, Barrell D, Bhai J, Billis K, Cummins C, Gall A,  
743 Girón CG, et al. 2018. Ensembl 2018. *Nucleic Acids Res* **46**: D754–D761.
- 744 Zhang J, Yang J-R. 2015. Determinants of the rate of protein sequence evolution. *Nat Rev*  
745 *Genet* **16**: 409–420.
- 746
